# Supplementary material
Source: MDPI journal article supplement (https://www.mdpi.com/2073-4395/6/4/61)
Supplement: s1 [file s1]

Table S1. Overall across year (2014 and 2015) and location (Hof Steimke, Germany; Les Rosiers, France; Logan, UT, USA; and Rexburg, ID, USA) mean values for 84 orchardgrass populations corresponding to water soluble carbohydrates (WSC), dry matter yield (DMY), crude protein (CP), neutral detergent fiber (NDF), acid detergent fiber (ADF), neutral detergent fiber digestibility (NDFD), rust resistance (RUST), and maturity (MAT).

| Effect | WSC | DMY | DDM | CP | NDF | ADF | NDFD | RUST | MAT |
| --- | --- | --- | --- | --- | --- | --- | --- | --- | --- |
| UDG005 | 9.2 | 5.0 | 68.4 | 12.9 | 57.7 | 32.8 | 65.3 | 4.4 | 4.4 |
| UDG033 | 9.1 | 5.0 | 68.7 | 13.0 | 57.2 | 32.5 | 67.3 | 4.6 | 4.3 |
| UDG033 | 9.1 | 5.0 | 68.7 | 13.0 | 57.2 | 32.5 | 67.3 | 4.6 | 4.3 |
| UDG035 | 8.9 | 4.7 | 68.7 | 13.5 | 57.0 | 32.5 | 66.4 | 4.3 | 4.0 |
| UDG035 | 8.9 | 4.7 | 68.7 | 13.5 | 57.0 | 32.5 | 66.4 | 4.3 | 4.0 |
| Muravka | 8.8 | 5.1 | 68.6 | 13.4 | 57.8 | 32.8 | 66.2 | 3.4 | 4.3 |
| UDG032 | 8.8 | 4.6 | 68.8 | 13.6 | 57.4 | 32.5 | 65.9 | 4.5 | 4.1 |
| UDG032 | 8.8 | 4.6 | 68.8 | 13.6 | 57.4 | 32.5 | 65.9 | 4.5 | 4.1 |
| UDG003 | 8.7 | 5.1 | 67.9 | 12.9 | 58.2 | 33.1 | 64.0 | 3.4 | 3.9 |
| UDG007 | 8.7 | 4.8 | 68.7 | 13.7 | 57.8 | 32.6 | 66.0 | 4.4 | 3.6 |
| UDG015 | 8.7 | 5.0 | 68.2 | 13.3 | 57.6 | 32.7 | 66.8 | 3.6 | 4.2 |
| UDG036 | 8.7 | 4.9 | 68.7 | 14.1 | 57.1 | 32.2 | 66.5 | 3.4 | 4.2 |
| UDG036 | 8.7 | 4.9 | 68.7 | 14.1 | 57.1 | 32.2 | 66.5 | 3.4 | 4.2 |
| Paykar | 8.6 | 4.9 | 68.0 | 13.4 | 58.0 | 33.1 | 64.9 | 3.1 | 1.9 |
| UDG006 | 8.6 | 4.8 | 68.7 | 13.2 | 57.7 | 32.9 | 67.8 | 4.5 | 3.6 |
| UDG009 | 8.6 | 4.8 | 68.5 | 13.8 | 57.2 | 32.5 | 66.5 | 3.9 | 4.0 |
| UDG011 | 8.6 | 5.1 | 68.2 | 12.7 | 58.2 | 33.1 | 66.5 | 4.4 | 4.2 |
| EDG008 | 8.5 | 5.9 | 67.7 | 12.1 | 59.3 | 34.0 | 64.9 | 6.5 | 2.3 |
| UDG016 | 8.5 | 5.1 | 68.1 | 13.2 | 57.6 | 33.1 | 65.4 | 4.4 | 4.2 |
| EDG019 | 8.4 | 6.1 | 67.7 | 12.3 | 59.2 | 33.8 | 64.9 | 8.4 | 2.7 |
| UDG002 | 8.4 | 5.1 | 68.4 | 13.1 | 57.9 | 33.1 | 66.5 | 3.6 | 3.6 |
| UDG025 | 8.4 | 5.5 | 68.0 | 12.8 | 58.3 | 33.4 | 65.3 | 4.3 | 3.7 |
| UDG025 | 8.4 | 5.5 | 68.0 | 12.8 | 58.3 | 33.4 | 65.3 | 4.3 | 3.7 |
| Harvestar | 8.3 | 5.8 | 67.6 | 12.2 | 59.3 | 34.0 | 65.5 | 5.8 | 3.3 |
| Lidacta | 8.3 | 5.6 | 67.8 | 12.7 | 58.7 | 33.4 | 65.0 | 6.3 | 3.3 |
| UDG013 | 8.3 | 5.1 | 68.0 | 13.1 | 58.3 | 33.3 | 66.1 | 4.0 | 4.3 |
| UDG028 | 8.3 | 5.1 | 68.5 | 13.4 | 58.1 | 33.2 | 67.3 | 4.0 | 3.5 |
| UDG031 | 8.3 | 4.8 | 68.4 | 13.6 | 57.8 | 32.8 | 66.7 | 4.6 | 4.0 |
| UDG034 | 8.3 | 5.2 | 68.1 | 13.2 | 58.1 | 33.3 | 65.3 | 4.9 | 3.9 |
| UDG028 | 8.3 | 5.1 | 68.5 | 13.4 | 58.1 | 33.2 | 67.3 | 4.0 | 3.5 |
| UDG031 | 8.3 | 4.8 | 68.4 | 13.6 | 57.8 | 32.8 | 66.7 | 4.6 | 4.0 |
| UDG034 | 8.3 | 5.2 | 68.1 | 13.2 | 58.1 | 33.3 | 65.3 | 4.9 | 3.9 |
| EDG021 | 8.2 | 6.0 | 67.5 | 11.9 | 59.5 | 34.4 | 65.6 | 7.6 | 2.2 |
| EDG025 | 8.2 | 5.5 | 67.8 | 12.9 | 59.2 | 34.1 | 65.7 | 7.6 | 1.4 |
| UDG014 | 8.2 | 5.3 | 67.7 | 13.2 | 58.6 | 33.4 | 65.4 | 3.6 | 3.1 |
| UDG029 | 8.2 | 4.9 | 68.5 | 14.0 | 58.0 | 32.9 | 67.0 | 5.0 | 4.0 |
| UDG029 | 8.2 | 4.9 | 68.5 | 14.0 | 58.0 | 32.9 | 67.0 | 5.0 | 4.0 |
| EDG032 | 8.1 | 5.8 | 67.3 | 12.2 | 59.3 | 34.3 | 63.9 | 7.5 | 2.2 |
| EDG034 | 8.1 | 5.7 | 68.1 | 12.8 | 58.9 | 33.4 | 66.0 | 7.4 | 2.1 |
| UDG012 | 8.1 | 5.4 | 68.1 | 13.7 | 58.3 | 33.0 | 65.6 | 4.8 | 4.2 |
| UDG017 | 8.1 | 5.2 | 68.0 | 13.7 | 57.9 | 33.1 | 65.1 | 5.1 | 4.2 |
| UDG042 | 8.1 | 4.5 | 68.0 | 13.7 | 58.3 | 33.4 | 65.6 | 4.4 | 3.8 |
| UDG042 | 8.1 | 4.5 | 68.0 | 13.7 | 58.3 | 33.4 | 65.6 | 4.4 | 3.8 |
| EDG004 | 8.0 | 5.8 | 66.7 | 12.2 | 60.2 | 34.4 | 62.9 | 7.4 | 2.7 |
| EDG013 | 8.0 | 5.6 | 67.1 | 12.4 | 59.8 | 34.3 | 65.3 | 7.8 | 2.4 |
| EDG016 | 8.0 | 5.9 | 67.6 | 12.7 | 59.0 | 33.8 | 65.5 | 7.5 | 3.2 |
| EDG033 | 8.0 | 5.7 | 67.7 | 13.2 | 58.8 | 33.5 | 65.5 | 8.3 | 2.0 |
| Totem | 8.0 | 5.5 | 67.5 | 12.3 | 59.9 | 34.0 | 66.2 | 7.8 | 2.7 |
| UDG018 | 8.0 | 4.5 | 68.5 | 13.9 | 57.7 | 32.5 | 67.9 | 4.3 | 3.8 |
| UDG022 | 8.0 | 5.0 | 67.9 | 14.0 | 58.2 | 32.9 | 66.0 | 4.0 | 3.6 |
| EDG003 | 7.9 | 5.7 | 68.0 | 12.7 | 59.1 | 33.8 | 65.5 | 8.3 | 1.3 |
| EDG009 | 7.9 | 5.8 | 67.5 | 13.0 | 59.2 | 33.5 | 64.8 | 8.1 | 2.1 |
| EDG017 | 7.9 | 5.6 | 67.2 | 12.5 | 59.5 | 34.1 | 64.7 | 7.8 | 2.2 |
| Latar | 7.9 | 5.4 | 67.8 | 13.6 | 58.3 | 33.3 | 66.4 | 4.1 | 2.0 |
| UDG021 | 7.9 | 5.2 | 68.4 | 14.2 | 57.8 | 32.6 | 65.9 | 3.5 | 4.3 |
| UDG023 | 7.9 | 5.3 | 67.6 | 12.9 | 58.5 | 33.6 | 65.4 | 3.8 | 4.6 |
| UDG039 | 7.9 | 5.1 | 67.7 | 13.3 | 58.6 | 33.2 | 66.4 | 4.5 | 4.3 |
| UDG043 | 7.9 | 4.5 | 67.7 | 13.7 | 58.2 | 33.2 | 63.8 | 2.8 | 2.7 |
| UDG039 | 7.9 | 5.1 | 67.7 | 13.3 | 58.6 | 33.2 | 66.4 | 4.5 | 4.3 |
| UDG043 | 7.9 | 4.5 | 67.7 | 13.7 | 58.2 | 33.2 | 63.8 | 2.8 | 2.7 |
| EDG001 | 7.8 | 5.6 | 67.2 | 12.5 | 59.9 | 34.5 | 64.1 | 7.3 | 2.1 |
| EDG010 | 7.8 | 5.9 | 67.7 | 13.2 | 59.2 | 33.6 | 65.4 | 7.9 | 1.9 |
| EDG031 | 7.8 | 6.1 | 67.1 | 12.0 | 60.4 | 34.6 | 66.1 | 7.6 | 2.0 |
| UDG001 | 7.8 | 5.0 | 68.2 | 13.9 | 57.5 | 33.1 | 65.8 | 4.6 | 3.9 |
| UDG020 | 7.8 | 5.0 | 68.0 | 13.8 | 58.3 | 33.3 | 66.3 | 3.5 | 4.0 |
| UDG040 | 7.8 | 5.2 | 67.9 | 13.6 | 58.6 | 33.0 | 66.3 | 4.9 | 4.4 |
| UDG040 | 7.8 | 5.2 | 67.9 | 13.6 | 58.6 | 33.0 | 66.3 | 4.9 | 4.4 |
| Accord | 7.7 | 5.5 | 67.2 | 12.7 | 59.9 | 34.2 | 64.6 | 7.6 | 2.8 |
| Duero | 7.7 | 5.9 | 67.4 | 12.1 | 60.2 | 34.5 | 65.5 | 8.0 | 2.1 |
| EDG005 | 7.7 | 5.4 | 66.7 | 12.3 | 60.0 | 34.5 | 63.9 | 7.3 | 1.5 |
| EDG007 | 7.7 | 5.5 | 67.2 | 12.4 | 60.1 | 34.2 | 64.6 | 8.0 | 2.2 |
| EDG011 | 7.7 | 5.9 | 66.9 | 12.2 | 60.4 | 34.6 | 64.8 | 8.1 | 2.1 |
| EDG020 | 7.7 | 6.0 | 66.8 | 11.8 | 60.7 | 35.0 | 64.6 | 8.3 | 1.6 |
| EDG027 | 7.7 | 5.7 | 67.3 | 12.4 | 60.3 | 34.4 | 66.0 | 6.9 | 1.8 |
| EDG028 | 7.7 | 5.9 | 67.4 | 12.5 | 59.2 | 33.8 | 65.5 | 6.9 | 2.4 |
| EDG029 | 7.7 | 5.9 | 67.2 | 12.3 | 60.1 | 34.3 | 65.4 | 7.9 | 2.3 |
| Paiute | 7.7 | 5.6 | 67.8 | 13.6 | 58.4 | 33.3 | 65.4 | 4.4 | 4.4 |
| EDG015 | 7.6 | 6.1 | 67.3 | 12.9 | 59.1 | 33.9 | 64.5 | 7.4 | 1.9 |
| EDG030 | 7.6 | 5.6 | 67.1 | 12.4 | 59.4 | 34.3 | 64.3 | 7.6 | 1.9 |
| UDG024 | 7.6 | 5.2 | 68.0 | 13.7 | 58.6 | 33.4 | 66.5 | 3.9 | 4.3 |
| EDG012 | 7.5 | 5.5 | 66.7 | 12.2 | 60.7 | 34.9 | 63.8 | 7.8 | 2.2 |
| EDG024 | 7.5 | 6.1 | 67.5 | 12.2 | 60.1 | 34.4 | 64.8 | 8.0 | 1.5 |
| EDG026 | 7.5 | 5.9 | 67.2 | 12.9 | 60.3 | 33.9 | 64.7 | 8.3 | 1.7 |
| UDG004 | 7.5 | 5.4 | 67.4 | 13.2 | 58.9 | 33.8 | 65.4 | 5.1 | 3.9 |
| UDG041 | 7.5 | 5.0 | 68.3 | 14.0 | 58.3 | 32.9 | 66.7 | 3.8 | 3.6 |
| UDG041 | 7.5 | 5.0 | 68.3 | 14.0 | 58.3 | 32.9 | 66.7 | 3.8 | 3.6 |
| EDG006 | 7.4 | 5.7 | 67.2 | 12.1 | 60.1 | 34.4 | 64.9 | 7.8 | 1.8 |
| EDG014 | 7.4 | 5.8 | 67.1 | 12.7 | 60.3 | 34.4 | 65.2 | 7.6 | 1.9 |
| EDG018 | 7.4 | 5.9 | 66.8 | 11.9 | 61.4 | 35.2 | 64.7 | 8.0 | 1.5 |
| EDG039 | 7.4 | 5.9 | 66.9 | 12.0 | 60.3 | 34.8 | 65.5 | 7.9 | 1.8 |
| UDG027 | 7.4 | 5.3 | 67.6 | 13.9 | 58.7 | 33.3 | 66.9 | 3.5 | 3.8 |
| UDG030 | 7.4 | 5.3 | 68.3 | 14.4 | 57.8 | 32.8 | 66.6 | 5.3 | 3.8 |
| UDG038 | 7.4 | 5.2 | 67.6 | 13.7 | 59.3 | 33.4 | 65.8 | 4.1 | 4.4 |
| UDG027 | 7.4 | 5.3 | 67.6 | 13.9 | 58.7 | 33.3 | 66.9 | 3.5 | 3.8 |
| UDG030 | 7.4 | 5.3 | 68.3 | 14.4 | 57.8 | 32.8 | 66.6 | 5.3 | 3.8 |
| UDG038 | 7.4 | 5.2 | 67.6 | 13.7 | 59.3 | 33.4 | 65.8 | 4.1 | 4.4 |
| EDG002 | 7.3 | 5.6 | 67.0 | 12.8 | 60.3 | 34.4 | 63.9 | 8.4 | 2.0 |
| UDG037 | 7.3 | 5.1 | 67.7 | 13.8 | 58.1 | 33.2 | 66.0 | 4.9 | 4.3 |
| UDG037 | 7.3 | 5.1 | 67.7 | 13.8 | 58.1 | 33.2 | 66.0 | 4.9 | 4.3 |
| EDG022 | 7.2 | 6.2 | 66.9 | 12.8 | 59.8 | 34.5 | 64.3 | 8.0 | 1.5 |
| UDG026 | 7.2 | 5.0 | 67.5 | 14.1 | 58.2 | 33.1 | 65.5 | 3.6 | 4.0 |
| UDG026 | 7.2 | 5.0 | 67.5 | 14.1 | 58.2 | 33.1 | 65.5 | 3.6 | 4.0 |
| EDG023 | 6.9 | 6.0 | 66.8 | 12.8 | 60.4 | 34.6 | 65.2 | 8.0 | 1.8 |
| LSD | 0.7 | 0.5 | 0.8 | 0.9 | 1.1 | 0.9 | 1.7 | 0.6 | 0.7 |
